# Supplementary material
Source: HighWire-hosted journal article supplement (https://www.cmajopen.ca/highwire/filestream/89589/field_highwire_adjunct_files/0/open-2022-0157-1-at.pdf)
Supplement: open-2022-0157-1-at.pdf [file open-2022-0157-1-at.pdf]

**Table S1. Cancer ICD-O-3 Codes**

| <b>Cancer site</b>         | <b>ICD.O-3 code</b>                                                                                                                                                                                                                                                                                                                                                                                                                                                                                                                                                                                                                                                                                                                                                                                                                                                                                          |
|----------------------------|--------------------------------------------------------------------------------------------------------------------------------------------------------------------------------------------------------------------------------------------------------------------------------------------------------------------------------------------------------------------------------------------------------------------------------------------------------------------------------------------------------------------------------------------------------------------------------------------------------------------------------------------------------------------------------------------------------------------------------------------------------------------------------------------------------------------------------------------------------------------------------------------------------------|
| Breast                     | C50.0 to 50.9                                                                                                                                                                                                                                                                                                                                                                                                                                                                                                                                                                                                                                                                                                                                                                                                                                                                                                |
| Skin                       | C44.2 to C 44.9                                                                                                                                                                                                                                                                                                                                                                                                                                                                                                                                                                                                                                                                                                                                                                                                                                                                                              |
| Gastro-intestinal          | C15.0 to C15.9                                                                                                                                                                                                                                                                                                                                                                                                                                                                                                                                                                                                                                                                                                                                                                                                                                                                                               |
|                            | C16.0 to C16.9                                                                                                                                                                                                                                                                                                                                                                                                                                                                                                                                                                                                                                                                                                                                                                                                                                                                                               |
|                            | Liver C22.0, C22.1<br>Biliary C23.9, C24.0, C24.1, C24.8, C24.9<br>Pancreas C25.0 to C25.9                                                                                                                                                                                                                                                                                                                                                                                                                                                                                                                                                                                                                                                                                                                                                                                                                   |
|                            | Small bowel C17.0 to C17.9<br>Colon C18.0 to C18.9<br>Rectum C19.9, C20.9<br>Anal: C21                                                                                                                                                                                                                                                                                                                                                                                                                                                                                                                                                                                                                                                                                                                                                                                                                       |
|                            |                                                                                                                                                                                                                                                                                                                                                                                                                                                                                                                                                                                                                                                                                                                                                                                                                                                                                                              |
| Genito-urinary             | C64.9, C65.9, C66.9, C67*, C68*                                                                                                                                                                                                                                                                                                                                                                                                                                                                                                                                                                                                                                                                                                                                                                                                                                                                              |
|                            | C67.0 to C67.9                                                                                                                                                                                                                                                                                                                                                                                                                                                                                                                                                                                                                                                                                                                                                                                                                                                                                               |
|                            | C61                                                                                                                                                                                                                                                                                                                                                                                                                                                                                                                                                                                                                                                                                                                                                                                                                                                                                                          |
|                            | C74.0, C74.1, C74.9                                                                                                                                                                                                                                                                                                                                                                                                                                                                                                                                                                                                                                                                                                                                                                                                                                                                                          |
|                            | C60<br>C62                                                                                                                                                                                                                                                                                                                                                                                                                                                                                                                                                                                                                                                                                                                                                                                                                                                                                                   |
| Gynecologic                | Vagina C52.9<br>Cervix C53.0, C53.1, C53.8, C53.9<br>Uterus C54.0, C54.1, C54.2, C54.3, C54.8, C54.9, C55.9<br>Ovaries C56.9, C57.0, C57.1, C57.2, C57.3, C57.4<br>Others C57.7, C57.8, C57.9                                                                                                                                                                                                                                                                                                                                                                                                                                                                                                                                                                                                                                                                                                                |
|                            | Vulva C51.0, 51.1, C51.2, C51.8, C51.9                                                                                                                                                                                                                                                                                                                                                                                                                                                                                                                                                                                                                                                                                                                                                                                                                                                                       |
| Broncho-pulmonary          | C30.0 to 34.9, C38.1 to 39.9                                                                                                                                                                                                                                                                                                                                                                                                                                                                                                                                                                                                                                                                                                                                                                                                                                                                                 |
| Head and Neck              | Oropharynx C10.0, C10.1, C10.2, C10.3, C10.4, C10.8, C10.9<br>Tongue C01.9, C02.0, C02.1, C02.2, C02.3, C02.4, C02.8, C02.9<br>Gum C03.0, C03.1, C03.9<br>Floor of Mouth C04.0, C04.1, C04.8, C04.9<br>Palate C05.0, C05.1, C05.2, C05.8, C05.9<br>Other Parts of Mouth C06.0, C06.1, C06.2, C06.8, C06.9<br>Parotid Gland C07.9<br>Salivary Glands C08.0, C08.1, C08.8, C08.9<br>Tonsil C09.0, C09.1, 09.8, C09.9<br>Nasopharynx C11.0, C11.1, C11.2, C11.3, C11.8, C11.9<br>Pyriform Sinus C12.9<br>Other Sites in lip, oral cavity, and pharynx C14.0 (pharynx), C14.2 (Waldeyer ring), C14.8 (overlap lesion of lip, oral cavity, and pharynx)<br>Other ill-defined head, face or neck C76.0<br>Oral Cavity C06.9, C14.8<br>Larynx C32.0, C32.1, C32.3, C32.8, C32.9<br>Hypopharynx C13.0, C13.1, C13.2, C13.8, C13.9<br>Lip C00.0, C00.1, C00.2, C00.3, C00.4, C00.5, C00.6, C00.8, C00.9, C14.8, C44.0 |
| Hematopoietic and Lymphoma | C42, C42.0, C42.1, C42.2, C42.3, C42.4                                                                                                                                                                                                                                                                                                                                                                                                                                                                                                                                                                                                                                                                                                                                                                                                                                                                       |
| CNS                        | C71, C72, C70                                                                                                                                                                                                                                                                                                                                                                                                                                                                                                                                                                                                                                                                                                                                                                                                                                                                                                |

| Cancer site           | ICD.O-3 code                                                                                                                                                                                                                                                                                                                                                                                                                                                                                                                                                                                                                                                                                                                                                                                                                                                                                                                                                                                                                                                                                                                                                                                                                                                                                                                                                                                                                                                                                                                                                                                                                                                                                                                                                                                                                                                      |
|-----------------------|-------------------------------------------------------------------------------------------------------------------------------------------------------------------------------------------------------------------------------------------------------------------------------------------------------------------------------------------------------------------------------------------------------------------------------------------------------------------------------------------------------------------------------------------------------------------------------------------------------------------------------------------------------------------------------------------------------------------------------------------------------------------------------------------------------------------------------------------------------------------------------------------------------------------------------------------------------------------------------------------------------------------------------------------------------------------------------------------------------------------------------------------------------------------------------------------------------------------------------------------------------------------------------------------------------------------------------------------------------------------------------------------------------------------------------------------------------------------------------------------------------------------------------------------------------------------------------------------------------------------------------------------------------------------------------------------------------------------------------------------------------------------------------------------------------------------------------------------------------------------|
| PNS                   | C47                                                                                                                                                                                                                                                                                                                                                                                                                                                                                                                                                                                                                                                                                                                                                                                                                                                                                                                                                                                                                                                                                                                                                                                                                                                                                                                                                                                                                                                                                                                                                                                                                                                                                                                                                                                                                                                               |
| Endocrine             | C73, C74, C75                                                                                                                                                                                                                                                                                                                                                                                                                                                                                                                                                                                                                                                                                                                                                                                                                                                                                                                                                                                                                                                                                                                                                                                                                                                                                                                                                                                                                                                                                                                                                                                                                                                                                                                                                                                                                                                     |
| Lung                  | (C34*), or (any topography code with Histology codes 90503, 90513, 90523, 90533)                                                                                                                                                                                                                                                                                                                                                                                                                                                                                                                                                                                                                                                                                                                                                                                                                                                                                                                                                                                                                                                                                                                                                                                                                                                                                                                                                                                                                                                                                                                                                                                                                                                                                                                                                                                  |
| Ophthalmologic        | C69                                                                                                                                                                                                                                                                                                                                                                                                                                                                                                                                                                                                                                                                                                                                                                                                                                                                                                                                                                                                                                                                                                                                                                                                                                                                                                                                                                                                                                                                                                                                                                                                                                                                                                                                                                                                                                                               |
| Sarcoma (Bone)        | <p>Pseudosarcomatous Carcinoma C34, C37</p> <p>Squamous Cell Carcinoma, Sarcomatoid C15 (Esophagus); C00-C06, C09-C10, C14 (Lip, Oral Cavity and Oropharynx); C13, C32, C33 (Hypopharynx, Larynx and Trachea); C44 (Skin); C60 (Penis); C30-C31 (Nasal cavity and Sinuses)</p> <p>Transitional Cell Carcinoma, Sarcomatoid C65-68</p> <p>Hepatocellular Carcinoma, Sarcomatoid C22.0</p> <p>Renal Cell Carcinoma, Spindle Cell C64, C64.9</p> <p>Granulosa Cell Tumor, Sarcomatoid C56.9; C62-C63 (Testis/Male genital organs); C56 (Ovary)</p> <p>Sertoli-Leydig Cell Tumor, Sarcomatoid C56</p> <p>Glomoid Sarcoma C75.4-C75.5</p> <p>Sarcoma NOS C49 (Connective, subcutaneous and other soft tissues); C34 (Bronchus and lung)</p> <p>Epithelioid Sarcoma C51 (Vulva)</p> <p>Undifferentiated Sarcoma C53 (Cervix uteri); C52 (Vagina)</p> <p>Fibrosarcoma, NOS C70, C71, C72 (Tumours of the central nervous system); C40-C41 (Bone)</p> <p>Liposarcoma, NOS C50 (Breast); C37 (Thymus); C38.1-C38.3 (Mediastinum); C61 (Prostate gland)</p> <p>Leiomyosarcoma, NOS C16 (Stomach); C54, C54.1 (Corpus uteri); C65-C68 (Urinary system: Renal pelvis, ureter, bladder, urethra); C57 (Fallopian tube and Uterine ligaments); C64, C64.9 (Kidney); C22 (Liver and intrahepatic bile ducts); C23-C24 (Gallbladder and extrahepatic biliary tract); C18-C20 (Colon and rectum); C17 (Small intestine)</p> <p>Carcinosarcoma, NOS C07-C08 (Salivary glands)</p> <p>Hemangiosarcoma C73 (Thyroid gland); C74 (Adrenal gland)</p> <p>Ewing Sarcoma C25 (Pancreas)</p> <p>Malignant Peripheral Nerve Sheath Tumor C47 (Peripheral nerves and autonomic nervous system)</p> <p>Hodgkin Sarcoma C42 and C77 (Tumours of hematopoietic and lymphoid tissues)</p> <p>Follicular Dendritic Cell Sarcoma C11 (Nasopharynx)</p> <p>Myeloid Sarcoma C69 (Eye and adnexa)</p> |
| Sarcoma (soft tissue) | Same as sarcoma bone                                                                                                                                                                                                                                                                                                                                                                                                                                                                                                                                                                                                                                                                                                                                                                                                                                                                                                                                                                                                                                                                                                                                                                                                                                                                                                                                                                                                                                                                                                                                                                                                                                                                                                                                                                                                                                              |
